# Supplementary material
Source: publisher figshare collection journal article supplement (https://asha.figshare.com/articles/dataset/_/28319345)

## Supplemental Material S7. Assessment of model convergence.

In the following plots, d[2] represents the relative effects of the condition with single talker compared to the no-training control; d[3] represents the relative effects of the condition with two talkers compared to the no-training control; d[4] represents the relative effects of the condition with three talkers compared to the no-training control; d[5] represents the relative effects of the condition with four talkers compared to the no-training control; d[6] represents the relative effects of the condition with five talkers compared to the no-training control; d[7] represents the relative effects of the condition with six talkers compared to the no-training control; d[8] represents the relative effects of the condition with thirty talkers compared to the no-training control; sd represents the between-study standard deviation.

### 7.1 Fixed-effects model

#### Gelman-Rubin statistics

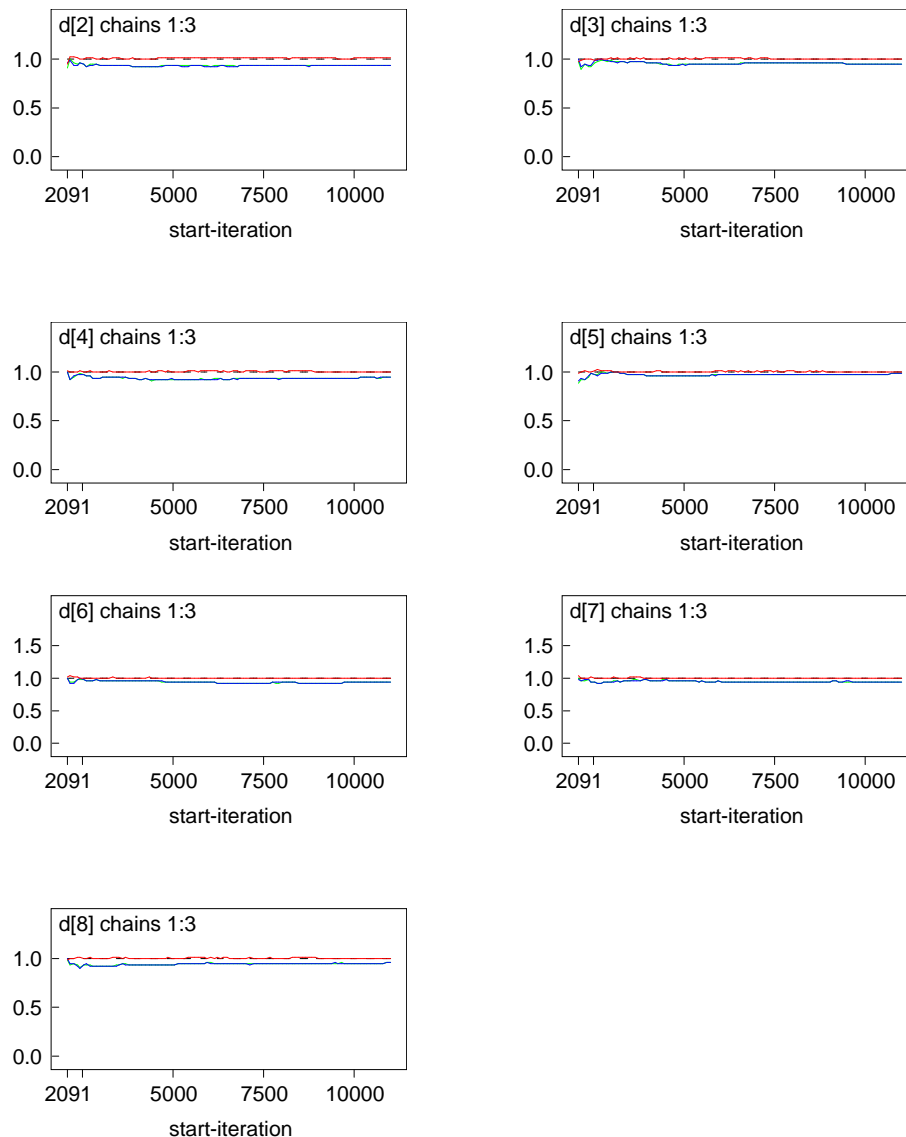

Trace plots

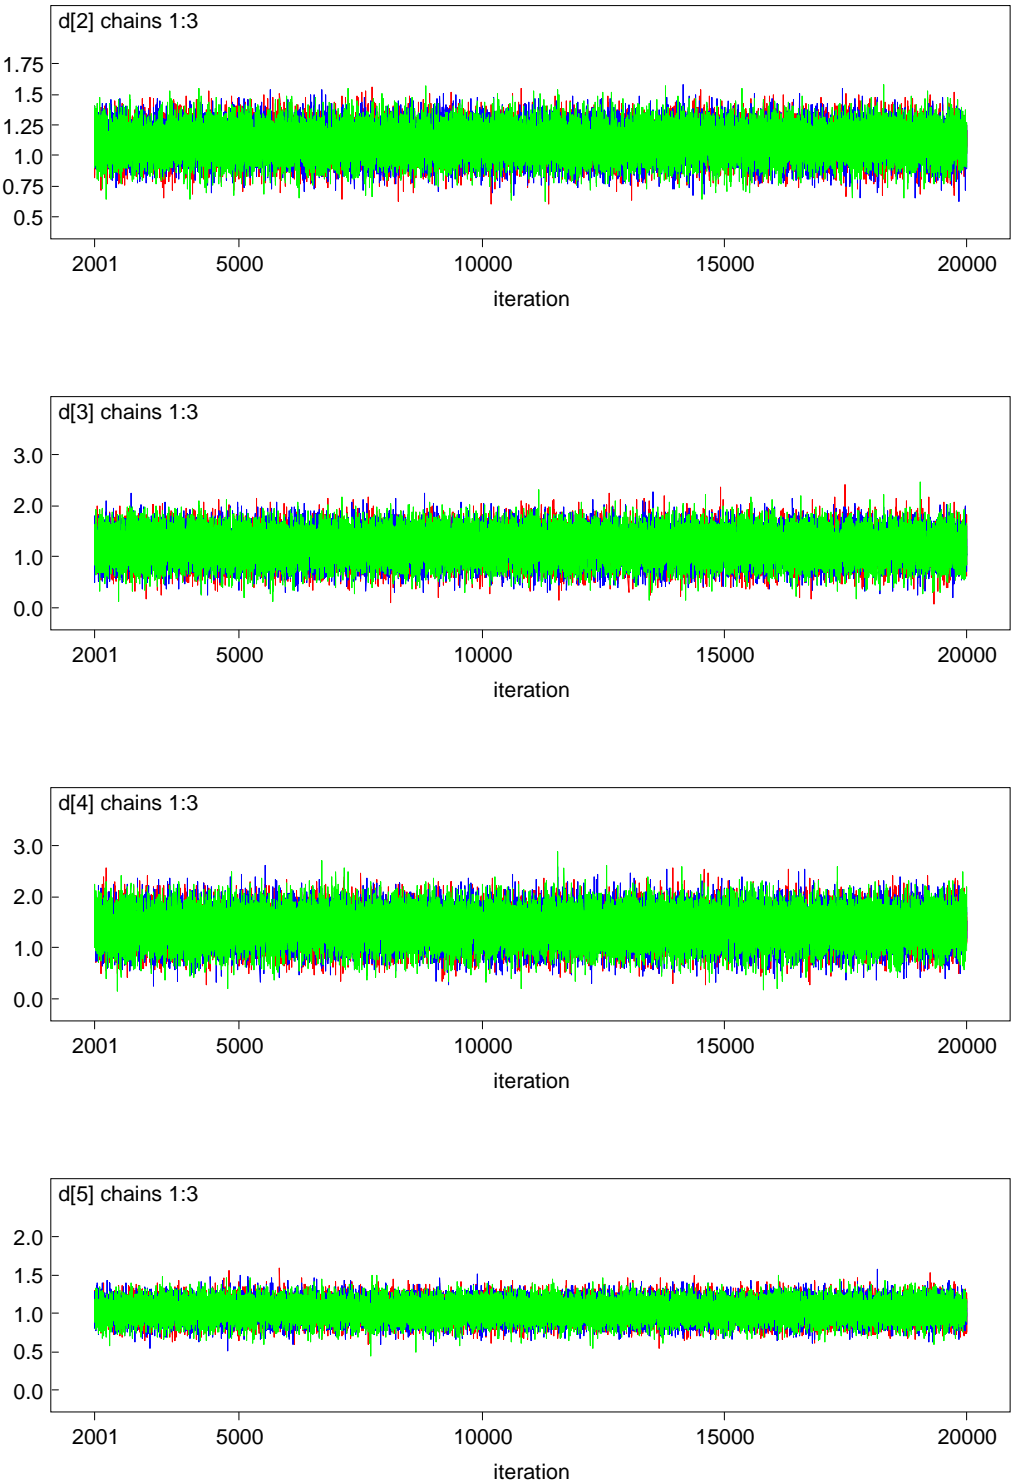

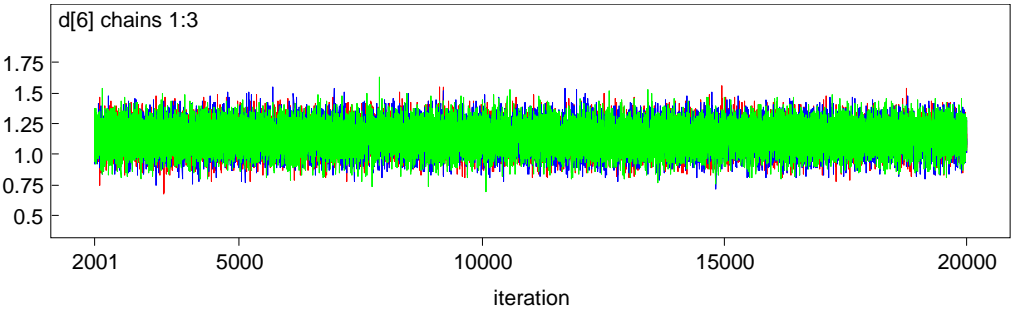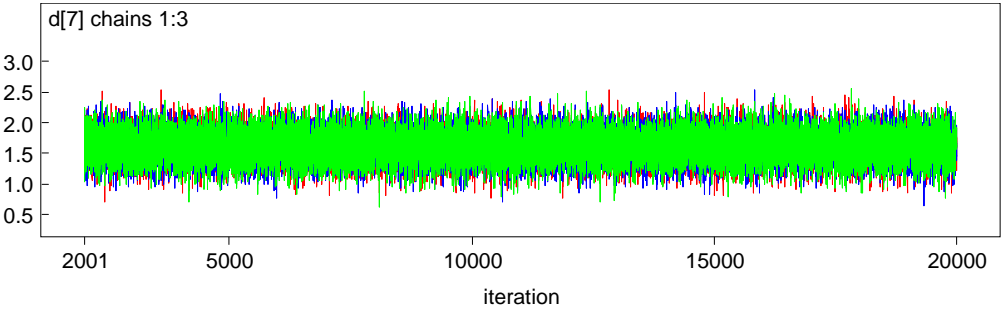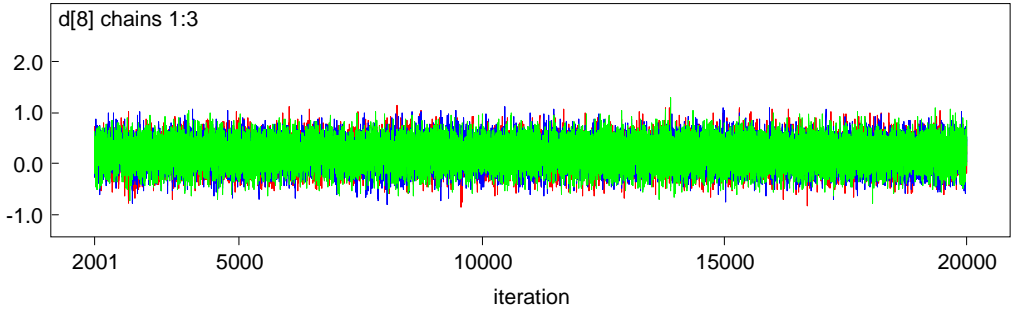

2. Random-effects model  
Gelman-Rubin statistics

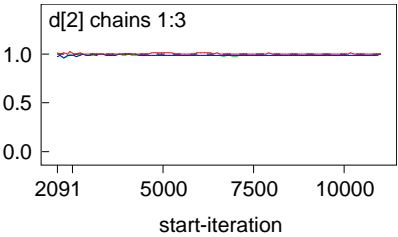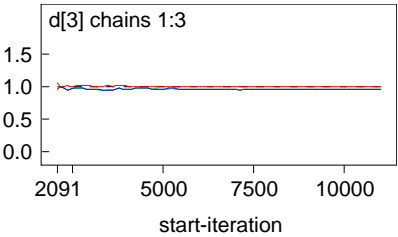

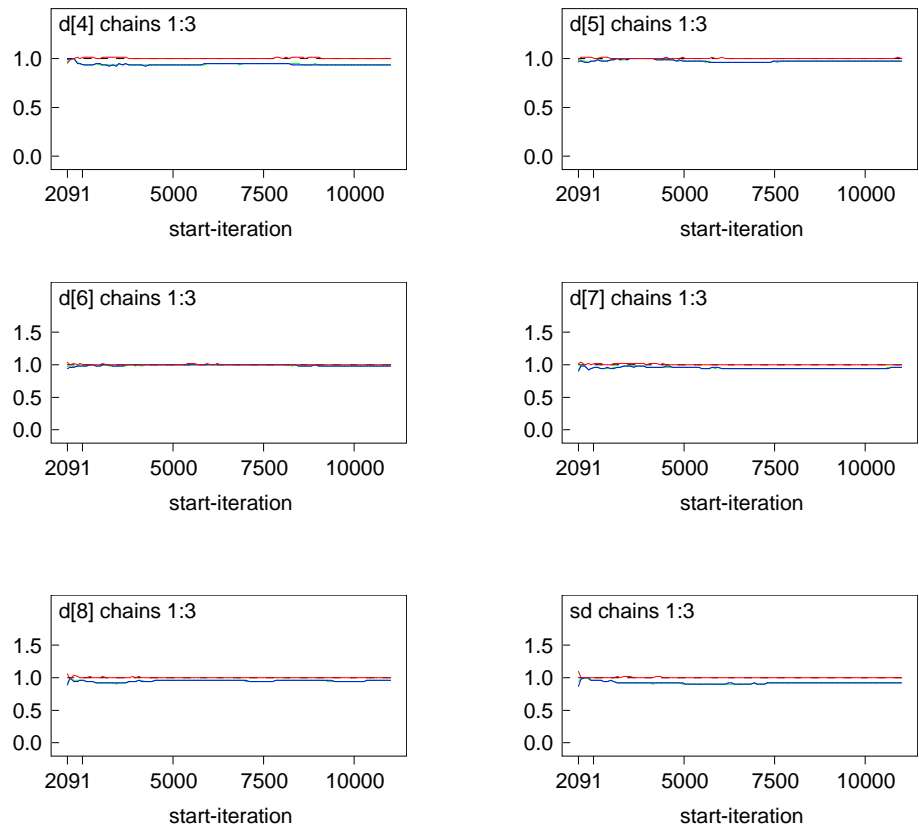

Trace plots

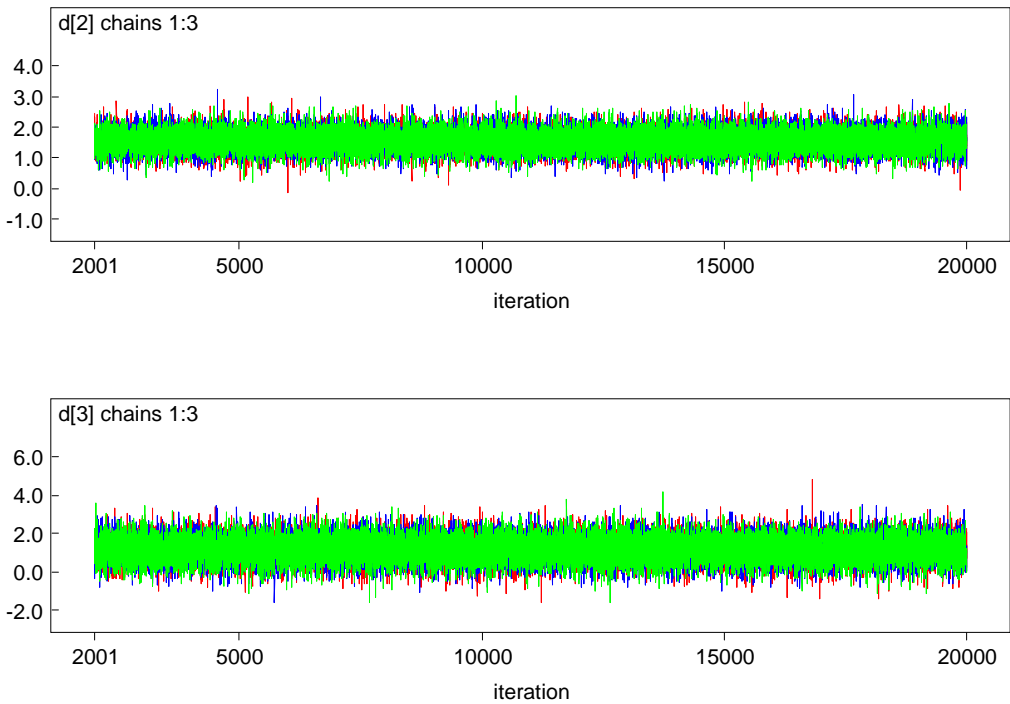

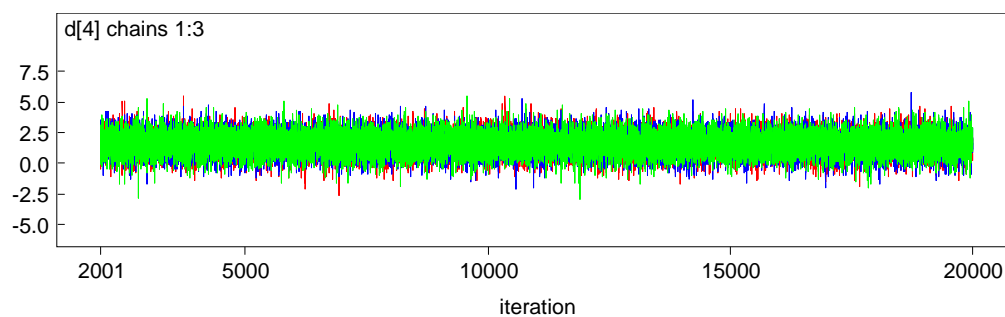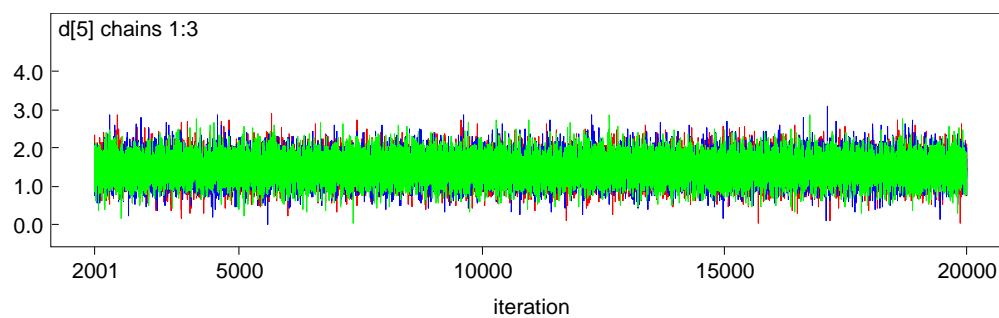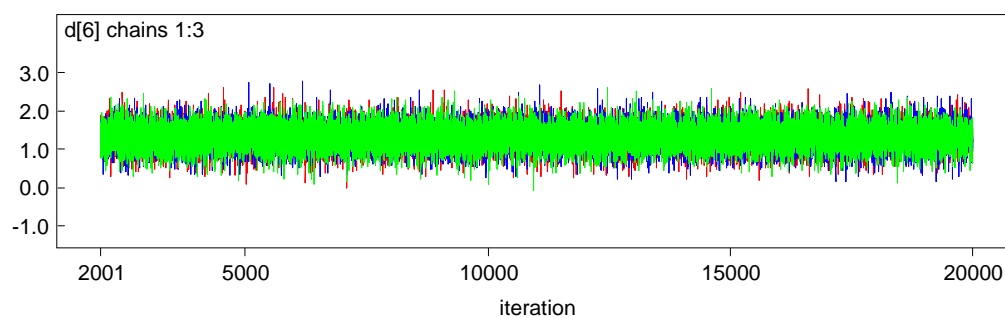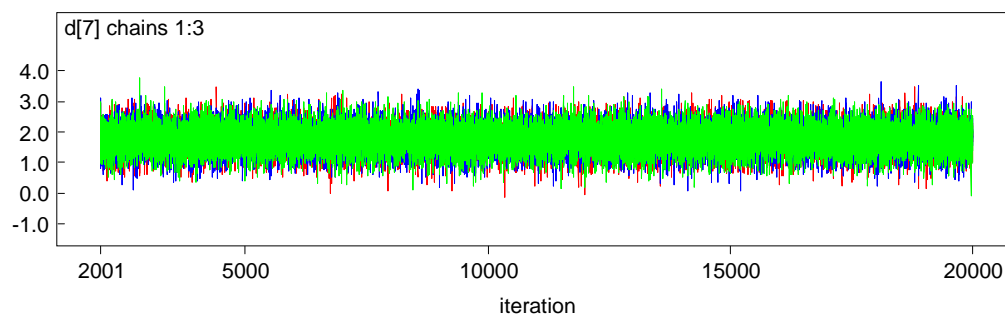

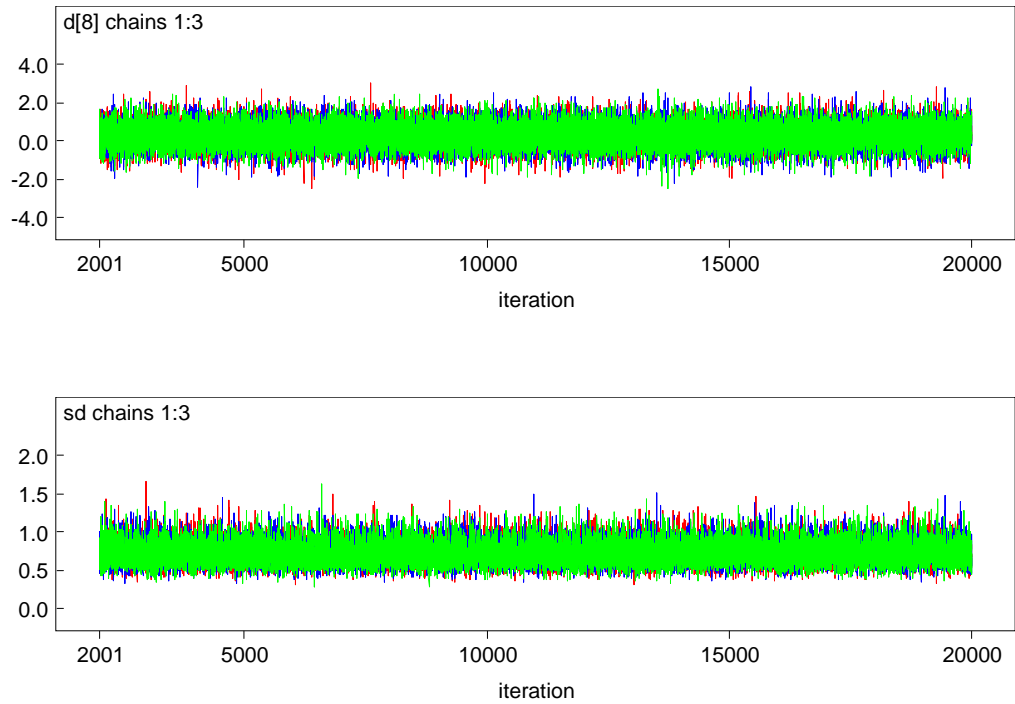

3. Random-effects model (outlier removed)  
Gelman-Rubin statistics

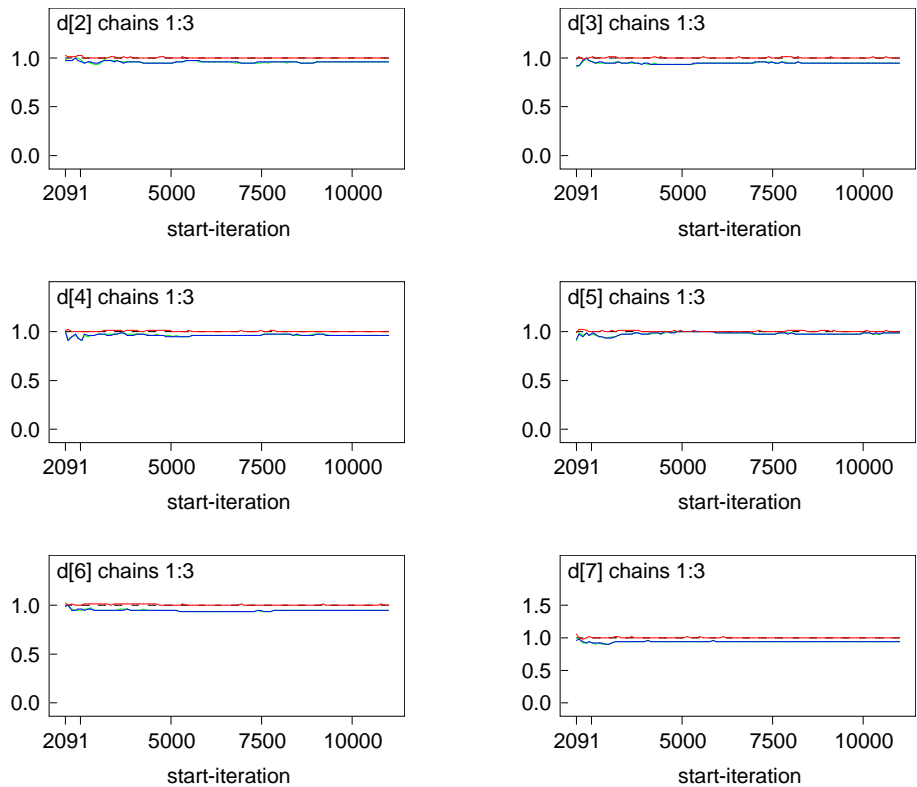

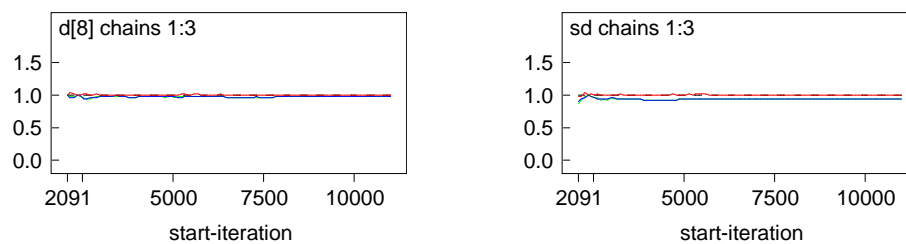

Trace plots

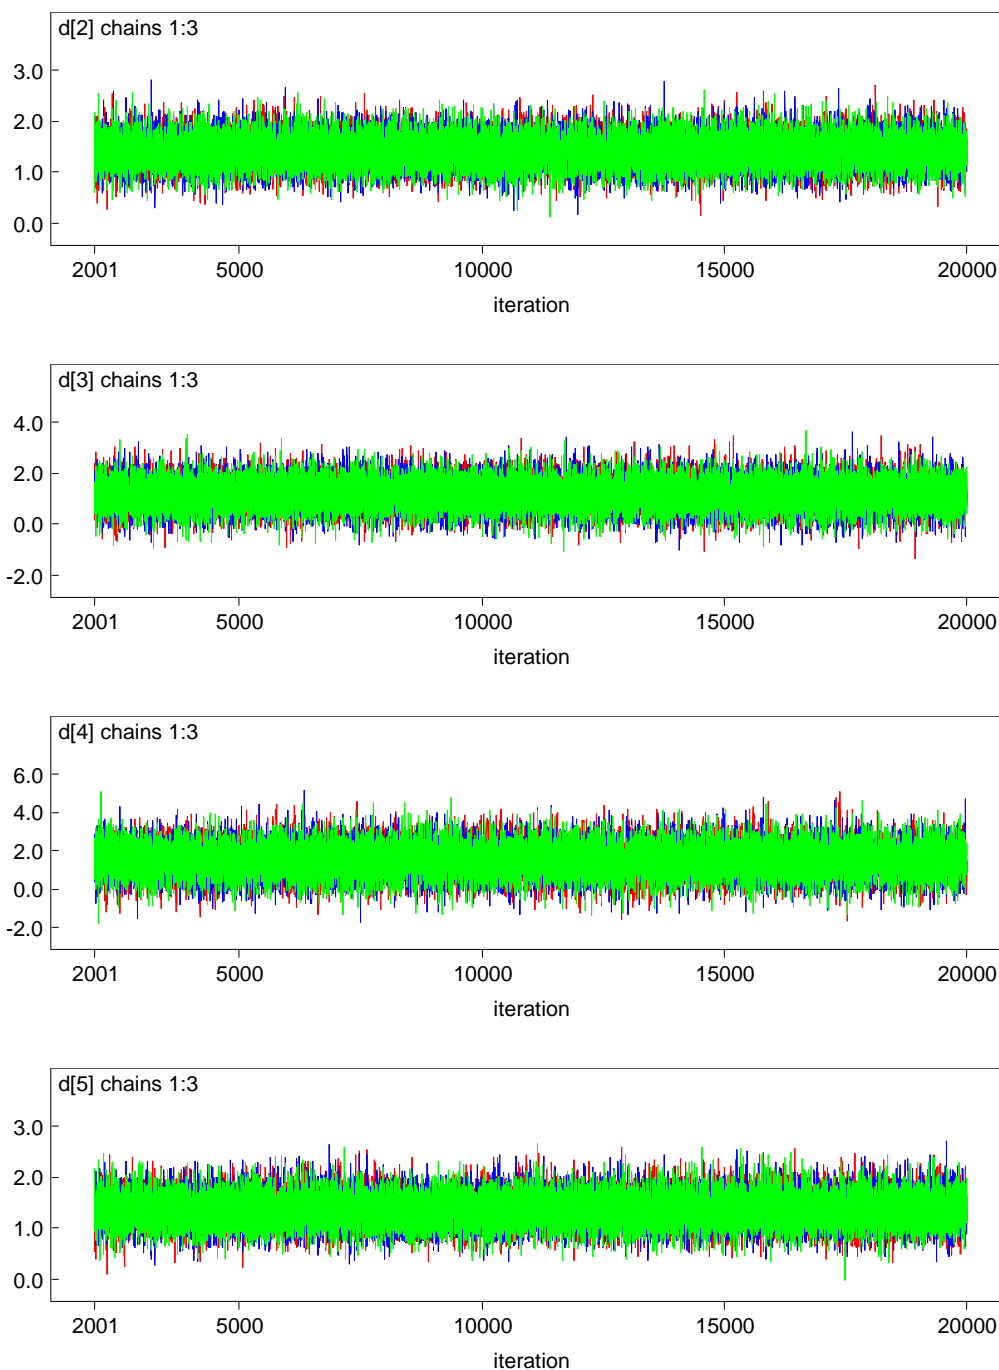

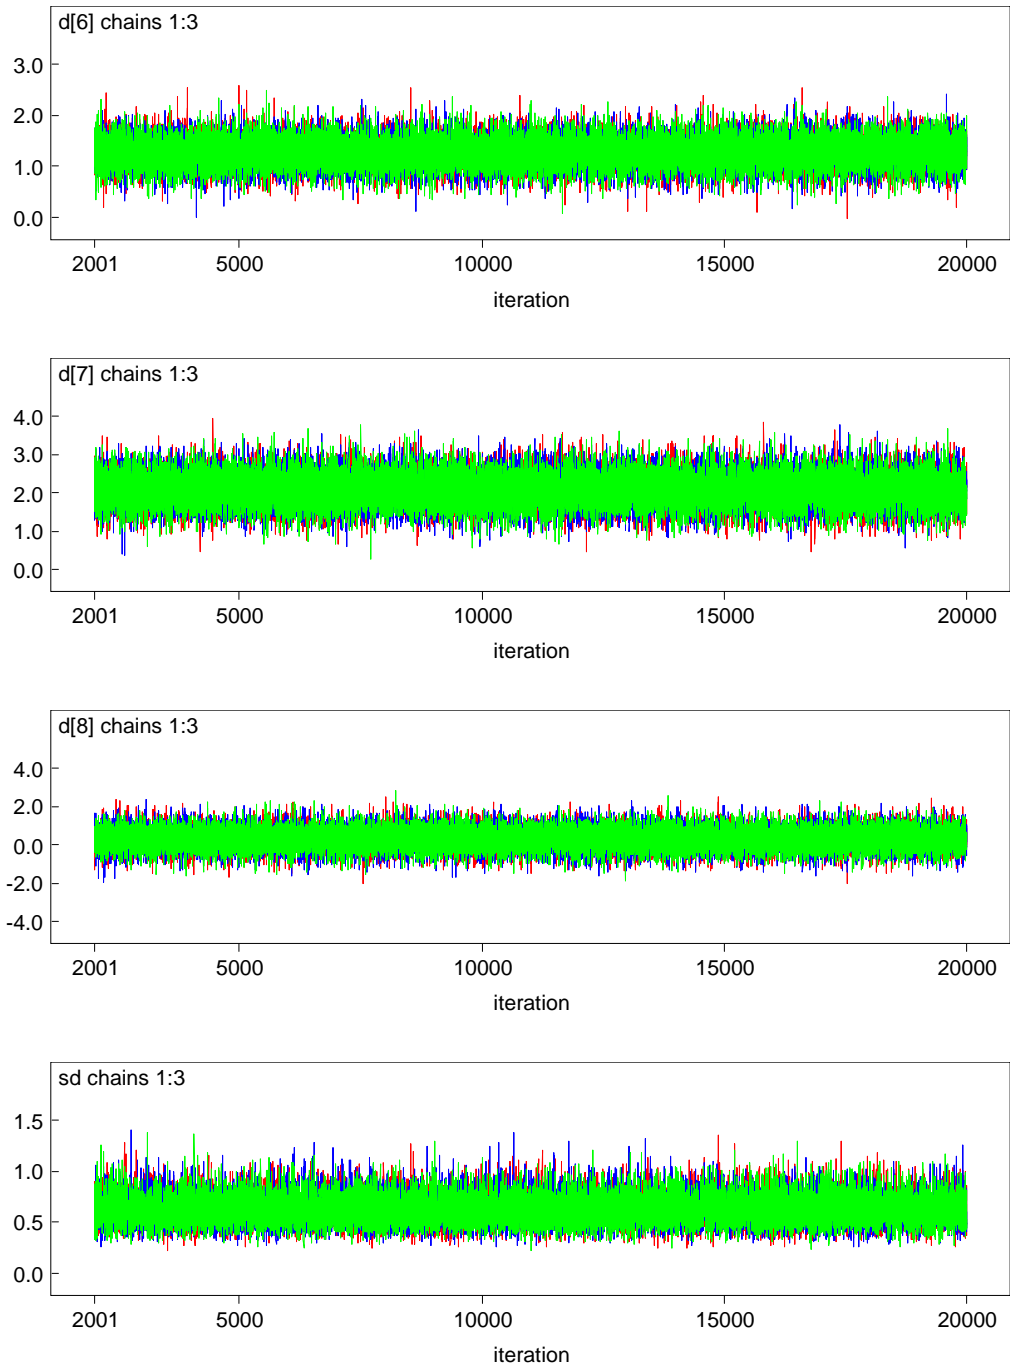

#### 4. Talker presentation model (random effects)

##### Gelman-Rubin statistics

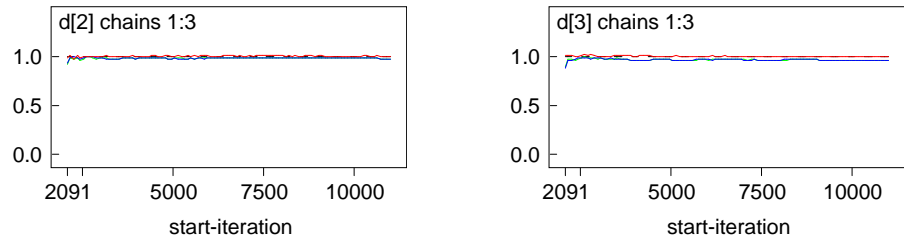



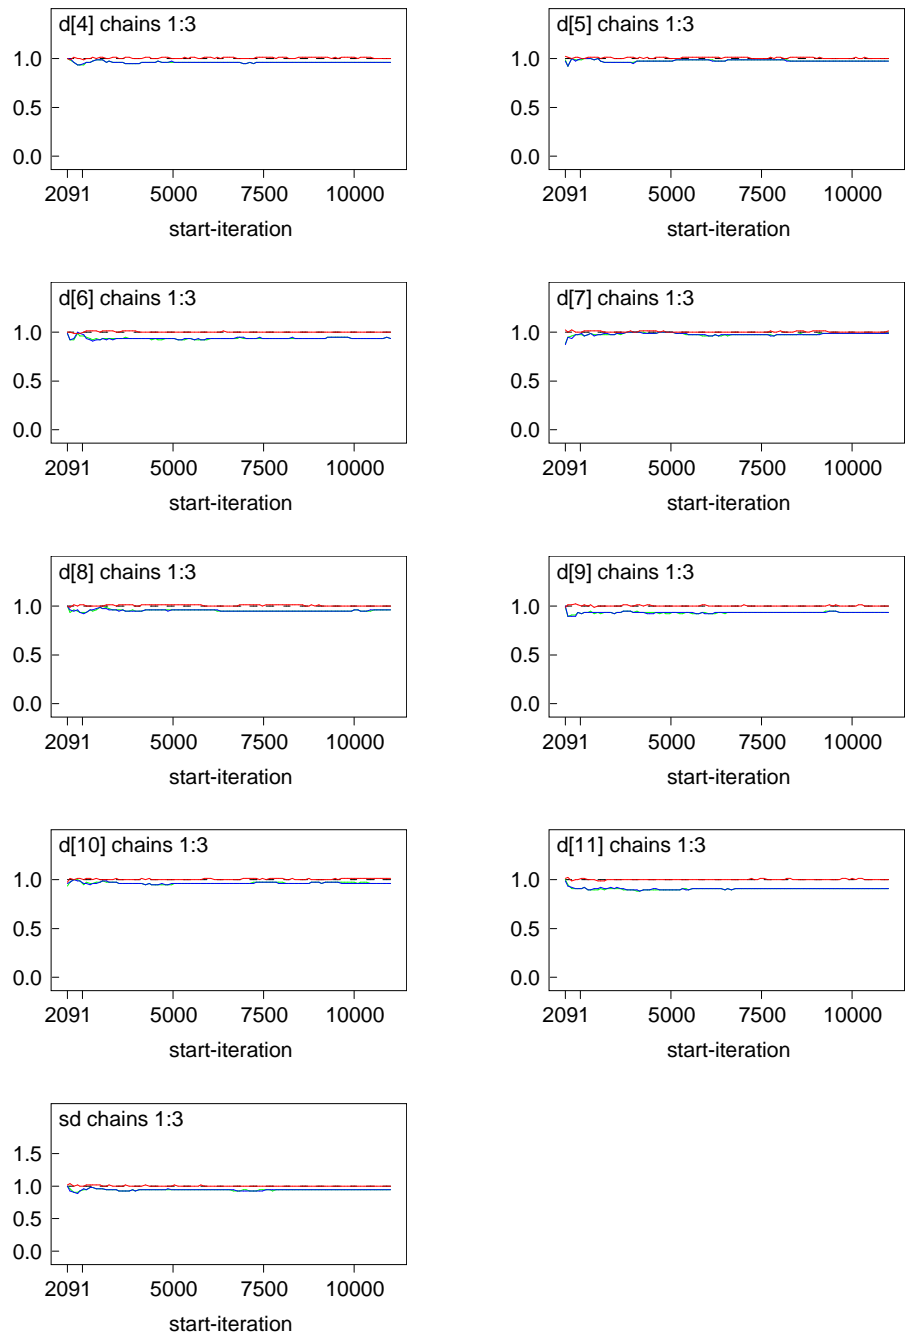

Trace plots

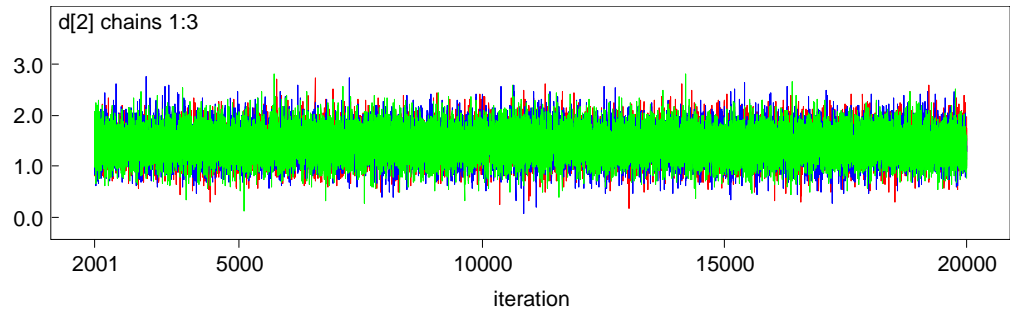

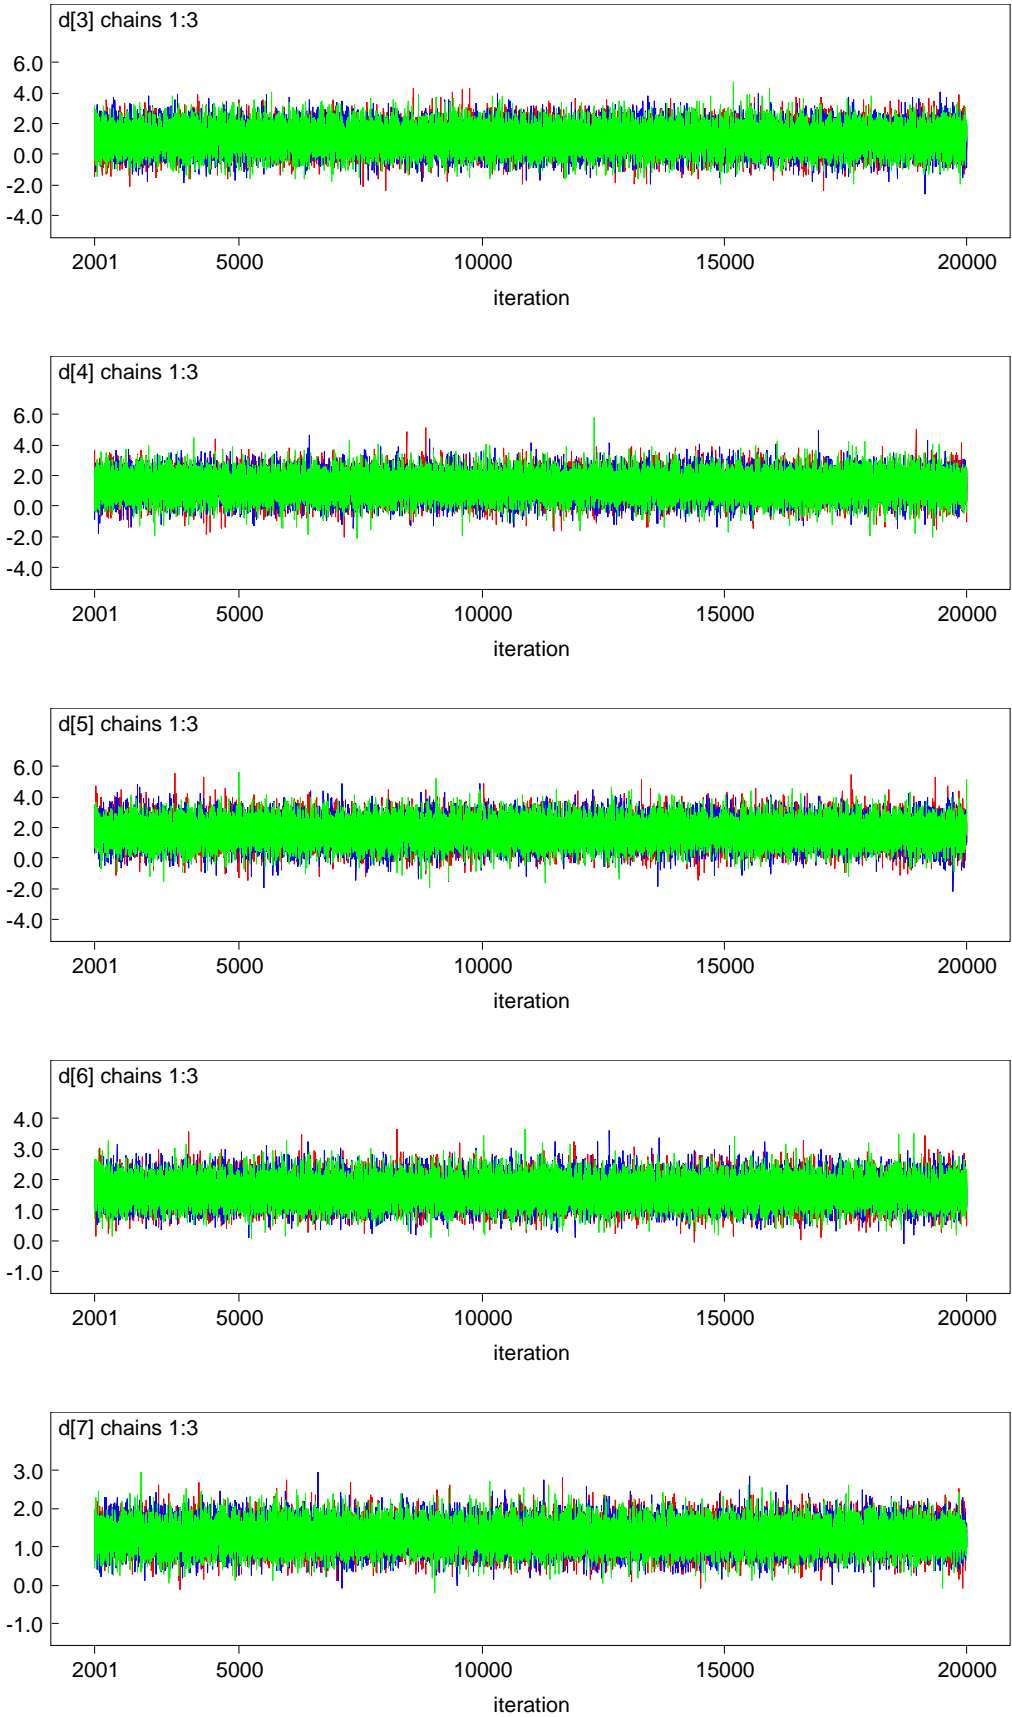

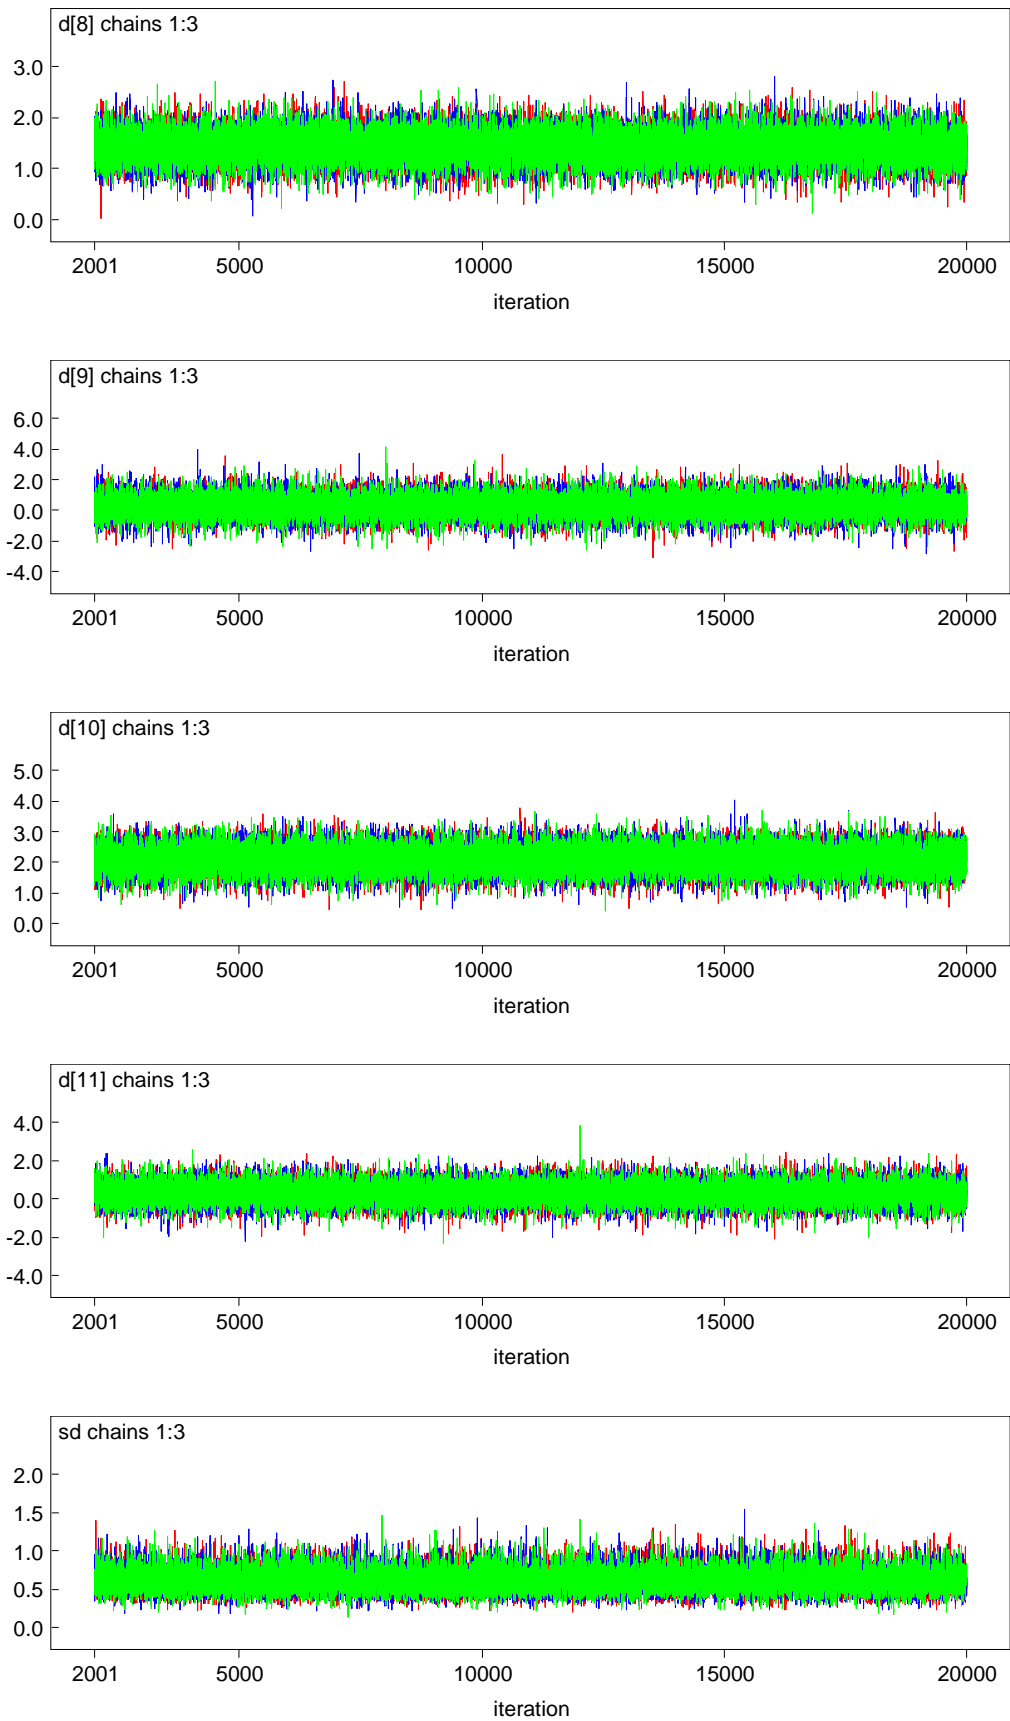

5. Talker presentation model including training exposure

Gelman-Rubin statistics

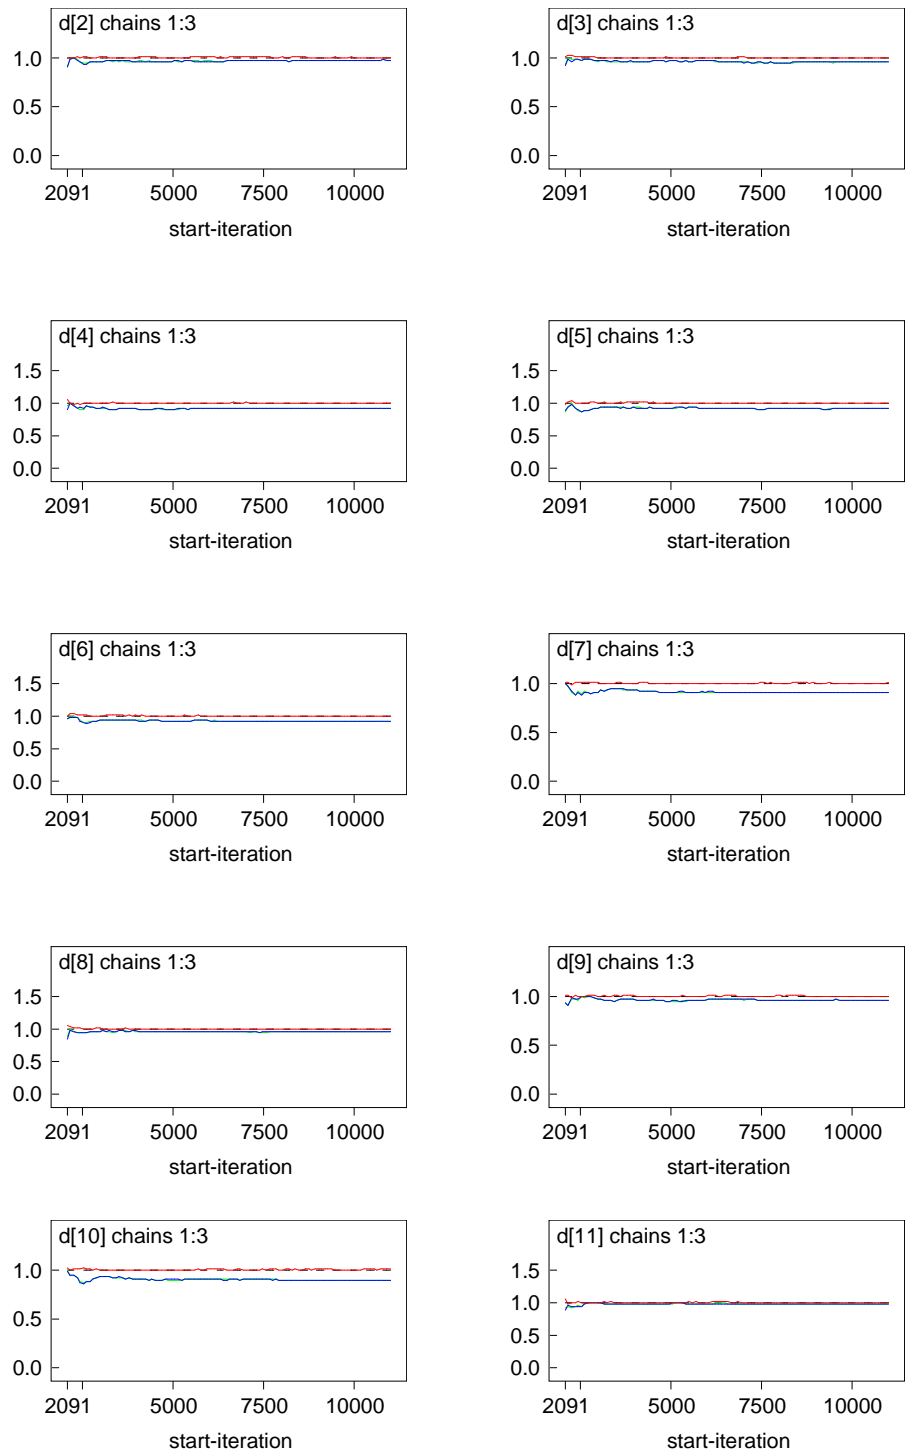

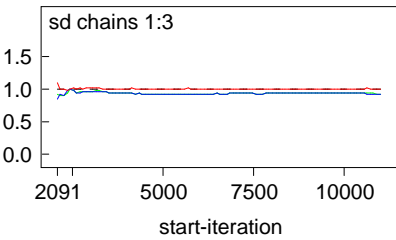

Trace plots

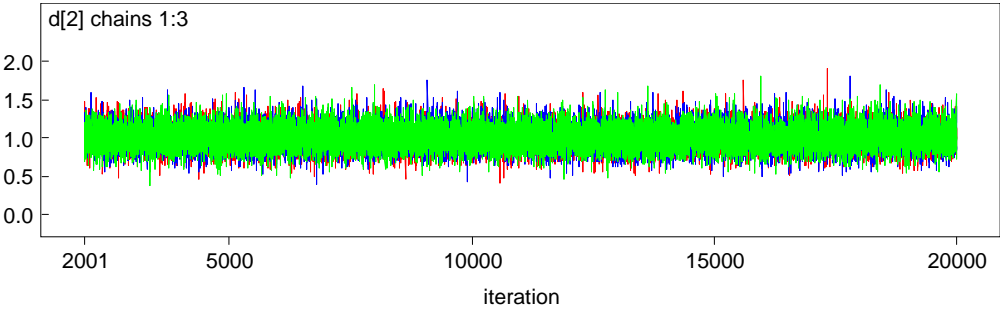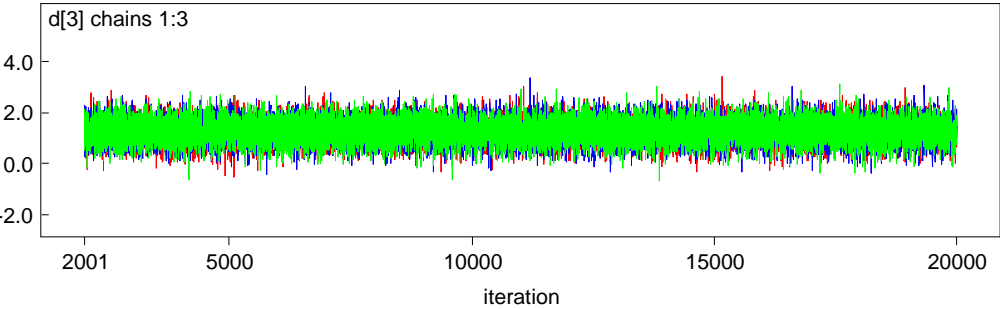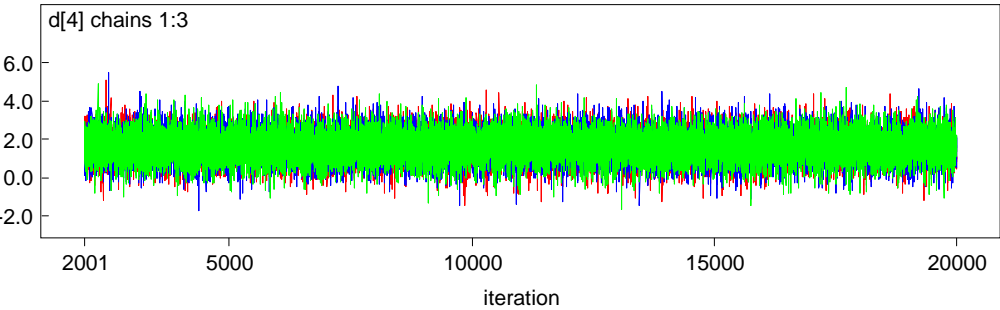

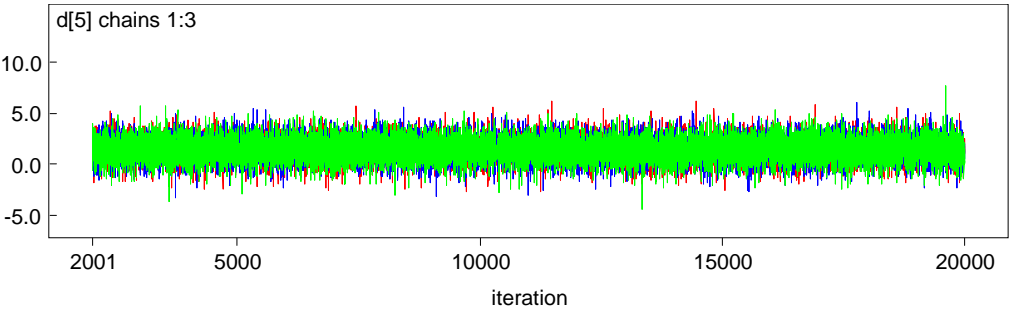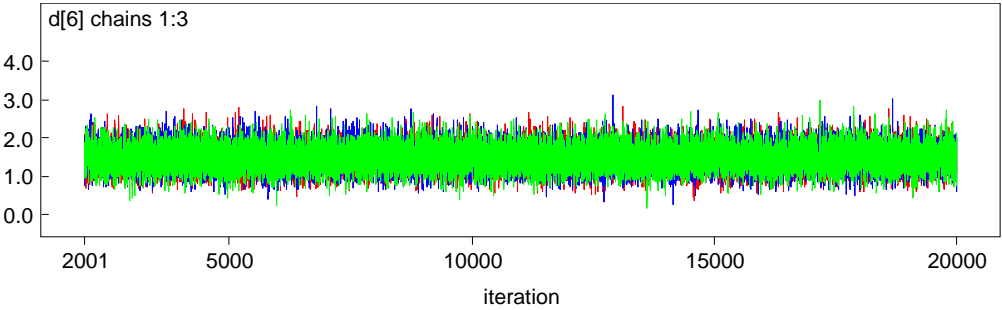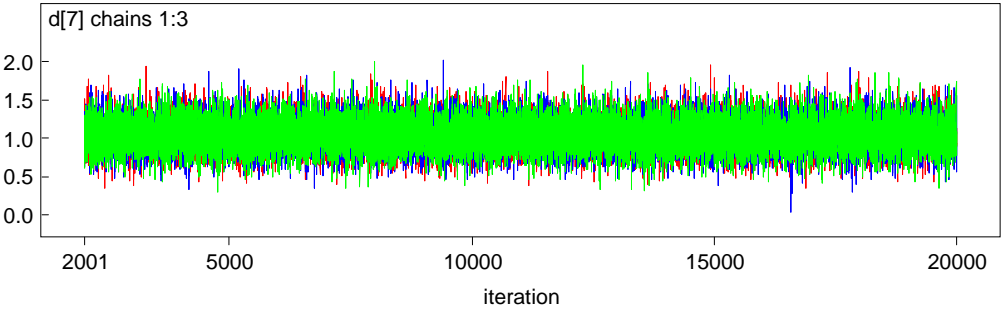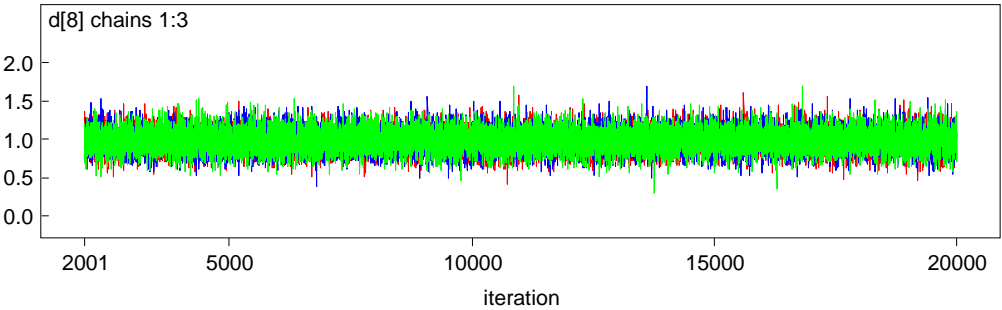

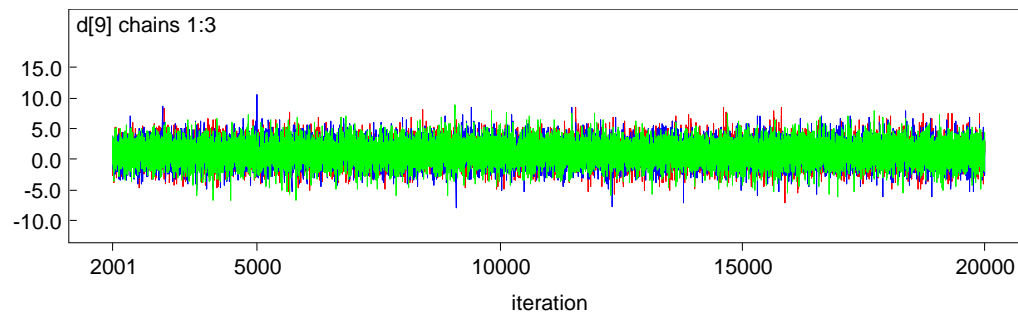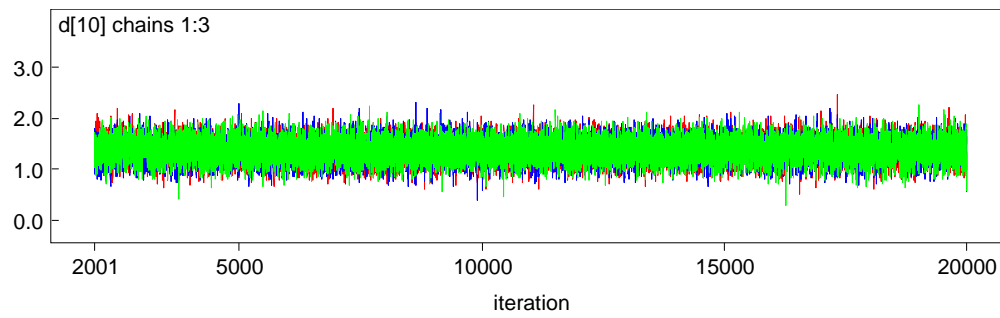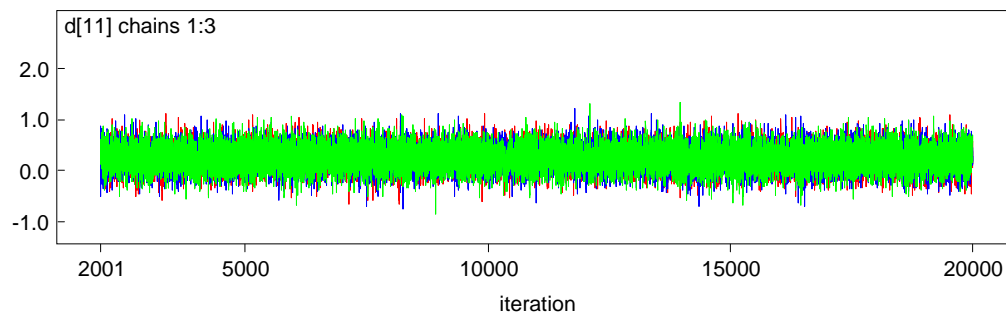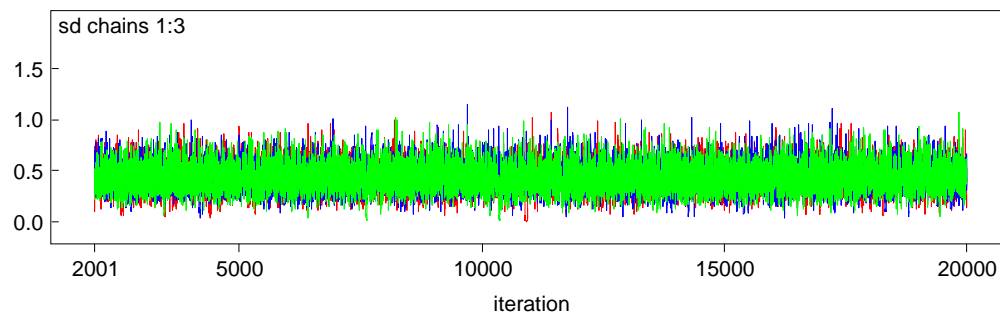

Supplement: Supplementary file 4 [file 1]
