# Supplementary material
Source: publisher figshare collection journal article supplement (https://asha.figshare.com/articles/dataset/_/28319345)
Supplement: Supplementary file 1 [file 1]

**Supplemental Material S8.** The deviance contribution plot.

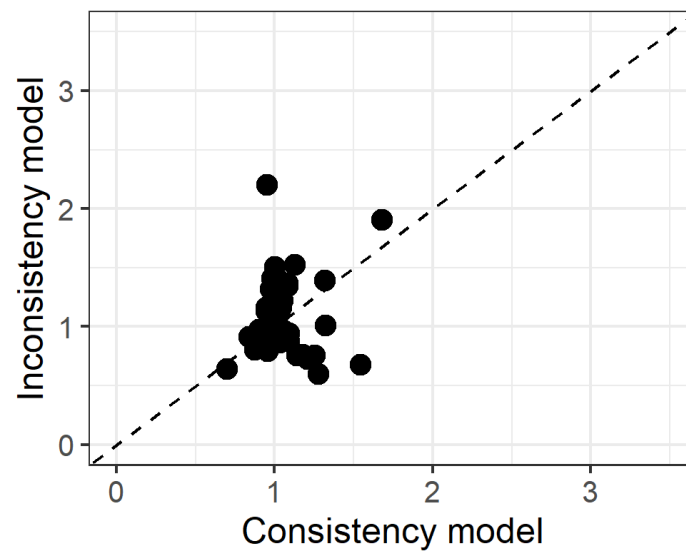

**Figure S1.** The deviance contribution plot for the random effects consistency model and the random effects inconsistency model.
