# Supplementary material
Source: publisher figshare collection journal article supplement (https://asha.figshare.com/articles/dataset/_/28319345)
Supplement: Supplementary file 2 [file 1]

**Supplemental Material S6.** Risk of bias for all included studies using the ROBINS-I scale.

| First author   | Year  | Comp<br>-arator | Type           | Variant<br>(Proficiency<br>of the target<br>language) | Outcome                                            | Bias due<br>to<br>confound<br>-ing | Bias due to<br>participant<br>selection | Bias due to<br>intervention<br>classification | Bias due to<br>deviations<br>from<br>intended<br>interventio<br>ns | Bias<br>due to<br>missing<br>data | Bias in<br>measurement<br>of outcomes | Bias due<br>to<br>selection<br>of<br>reported<br>result | Overall<br>Risk of<br>Bias |
|----------------|-------|-----------------|----------------|-------------------------------------------------------|----------------------------------------------------|------------------------------------|-----------------------------------------|-----------------------------------------------|--------------------------------------------------------------------|-----------------------------------|---------------------------------------|---------------------------------------------------------|----------------------------|
| Barriuso       | 2018a | 0:30            | HVPT-<br>Vowel | Beginner                                              | d'prime of<br>ABX<br>discrimination                | Moderate                           | Low                                     | Moderate                                      | Moderate                                                           | Low                               | Low                                   | Low                                                     | Moderate                   |
| Barriuso       | 2018b | 0:30            |                | Intermediate                                          | d'prime of<br>ABX<br>discrimination                | Low                                | Low                                     | Low                                           | Moderate                                                           | Low                               | Low                                   | Low                                                     | Moderate                   |
| Fouz-González  | 2021  | 0:4             |                | Intermediate                                          | score of ID                                        | Low                                | Low                                     | Low                                           | Low                                                                | Low                               | Low                                   | Low                                                     | Low                        |
| Giannakopoulou | 2017a | 1:4             |                | Advanced                                              | Acc of three-<br>interval oddity<br>discrimination | Low                                | Low                                     | Low                                           | Low                                                                | Low                               | Low                                   | Low                                                     | Low                        |
| Giannakopoulou | 2017b | 1:4             |                | Advanced                                              | Acc of three-<br>interval oddity<br>discrimination | Low                                | Low                                     | Low                                           | Low                                                                | Low                               | Low                                   | Low                                                     | Low                        |
| Lambacher      | 2005  | 0:5             |                | Intermediate                                          | Acc of<br>Identification                           | Low                                | Low                                     | Low                                           | Low                                                                | Low                               | Low                                   | Low                                                     | Low                        |
| Lengeris       | 2010  | 0:5             |                | Advanced                                              | Acc of<br>Identification                           | Low                                | Low                                     | Low                                           | Low                                                                | Low                               | Low                                   | Low                                                     | Low                        |
| Lerdpaisalwong | 2015a | 2:2             |                | Intermediate                                          | Acc of<br>Identification<br>( <i>t</i> value)      | Low                                | Low                                     | Moderate                                      | Low                                                                | Low                               | Low                                   | Low                                                     | Moderate                   |

|                |       |       |                |              |                                            |          |     |          |     |     |     |     |          |
|----------------|-------|-------|----------------|--------------|--------------------------------------------|----------|-----|----------|-----|-----|-----|-----|----------|
| Mokari         | 2018  | 0:5   |                | Intermediate | Sensitivity A' score of discrimination     | Low      | Low | Low      | Low | Low | Low | Low | Low      |
| Nishi          | 2007  | 0:2   |                | N/A          | Acc of Identification                      | Moderate | Low | Moderate | Low | Low | Low | Low | Moderate |
| Wong           | 2013a | 0:1:6 |                | Intermediate | Acc of Identification                      | Low      | Low | Low      | Low | Low | Low | Low | Low      |
| Wong           | 2013b | 0:1:6 |                | Intermediate | Acc of Identification                      | Low      | Low | Low      | Low | Low | Low | Low | Low      |
| Wong           | 2013c | 0:1:6 |                | Intermediate | Acc of Identification                      | Low      | Low | Low      | Low | Low | Low | Low | Low      |
| Wong           | 2013d | 1:6   |                | Intermediate | Acc of Identification                      | Low      | Low | Low      | Low | Low | Low | Low | Low      |
| Wong           | 2013e | 1:6   |                | Intermediate | Acc of Identification                      | Low      | Low | Low      | Low | Low | Low | Low | Low      |
| Wong           | 2013f | 1:6   |                | Intermediate | Acc of Identification                      | Low      | Low | Low      | Low | Low | Low | Low | Low      |
| Zhang          | 2021  | 1:4   |                | Intermediate | Acc of Identification                      | Low      | Low | Low      | Low | Low | Low | Low | Low      |
| Bradlow        | 1999  | 0:5   | HVPT-Consonant | Intermediate | Acc of Identification                      | Low      | Low | Low      | Low | Low | Low | Low | Low      |
| Brekelmans     | 2022  | 1:5   |                | Intermediate | Acc of Identification                      | Moderate | Low | Moderate | Low | Low | Low | Low | Moderate |
| Lengeris       | 2014  | 0:5   |                | Intermediate | Acc of Identification                      | Low      | Low | Low      | Low | Low | Low | Low | Low      |
| Lerdpaisalwong | 2015b | 2:2   |                | Intermediate | Acc of Identification<br>( <i>t</i> value) | Low      | Low | Moderate | Low | Low | Low | Low | Moderate |

|                |       |       |           |              |                                            |     |     |          |          |     |     |     |          |
|----------------|-------|-------|-----------|--------------|--------------------------------------------|-----|-----|----------|----------|-----|-----|-----|----------|
| Lerdpaisalwong | 2015c | 2:2   |           | Intermediate | Acc of Identification<br>( <i>t</i> value) | Low | Low | Moderate | Low      | Low | Low | Low | Moderate |
| Lively         | 1993  | 1:5   |           | Intermediate | Acc of Identification<br>( <i>F</i> value) | Low | Low | Low      | Low      | Low | Low | Low | Low      |
| Lively         | 1994  | 0:5   |           | Intermediate | Acc of Identification<br>( <i>F</i> value) | Low | Low | Low      | Low      | Low | Low | Low | Low      |
| Shum           | 2021  | 0:4   |           | Intermediate | Acc of Identification                      | Low | Low | Low      | Low      | Low | Low | Low | Low      |
| Poulsen        | 2023  | 0:2   | HVPT-Tone | Advanced     | Acc of Identification                      | Low | Low | Low      | Low      | Low | Low | Low | Low      |
| Deng           | 2018  | 1:4   |           | Beginner     | Acc of Identification                      | Low | Low | Low      | Low      | Low | Low | Low | Low      |
| Dong           | 2019  | 1:4:4 |           | Beginner     | Acc of Discrimination                      | Low | Low | Low      | Moderate | Low | Low | Low | Moderate |
| Sadakata       | 2014  | 3:5   |           | Beginner     | Acc of Identification                      | Low | Low | Low      | Low      | Low | Low | Low | Low      |
| Silpachai      | 2020  | 1:4   |           | Beginner     | Acc of Identification                      | Low | Low | Low      | Low      | Low | Low | Low | Low      |
| Wang           | 1999  | 0:4   |           | Beginner     | Acc of Identification                      | Low | Low | Low      | Low      | Low | Low | Low | Low      |
| Wang           | 2013  | 0:4   |           | Beginner     | Acc of Identification                      | Low | Low | Low      | Low      | Low | Low | Low | Low      |
