# Supplementary material
Source: publisher figshare collection journal article supplement (https://asha.figshare.com/articles/dataset/_/28319345)
Supplement: Supplementary file 3 [file 1]

## Supplemental Material S4. Full references for the 24 included studies.

- Barriuso, T. A. (2018). *The L2 acquisition of phonemes and allophones under various exposure conditions* (Publication No. 10928607) [Doctoral dissertation, The University of Utah]. ProQuest Dissertations and Theses Global.
- Bradlow, A. R., Akahane-Yamada, R., Pisoni, D. B., & Tohkura, Y. (1999). Training Japanese listeners to identify English /r/ and /l/: Long-term retention of learning in perception and production. *Perception & Psychophysics*, 61(5), 977–985. <https://doi.org/10.3758/BF03206911>
- Brekelmans, G., Lavan, N., Saito, H., Clayards, M., & Wonnacott, E. (2022). Does high variability training improve the learning of non-native phoneme contrasts over low variability training? A replication. *Journal of Memory and Language*, 126, Article 104352. <https://doi.org/10.1016/j.jml.2022.104352>
- Deng, Z., Chandrasekaran, B., Wang, S., & Wong, P. C. M. (2018). Training-induced brain activation and functional connectivity differentiate multi-talker and single-talker speech training. *Neurobiology of Learning and Memory*, 151, 1–9. <https://doi.org/10.1016/j.nlm.2018.03.009>
- Dong, H., Clayards, M., Brown, H., & Wonnacott, E. (2019). The effects of high versus low talker variability and individual aptitude on phonetic training of Mandarin lexical tones. *PeerJ*, 7, Article e7191. <https://doi.org/10.7717/peerj.7191>
- Fouz-González, J., & Mompean, J. A. (2021). Exploring the potential of phonetic symbols and keywords as labels for perceptual training. *Studies in Second Language Acquisition*, 43(2), 297–328. <https://doi.org/10.1017/S0272263120000455>
- Giannakopoulou, A., Brown, H., Clayards, M., & Wonnacott, E. (2017). High or low? Comparing high and low-variability phonetic training in adult and child second language learners. *PeerJ*, 2017(5). <https://doi.org/10.7717/peerj.3209>
- Iverson, P., Pinet, M., & Evans, B. G. (2012). Auditory training for experienced and inexperienced second-language learners: Native French speakers learning English vowels. *Applied Psycholinguistics*, 33(1), 145–160. <https://doi.org/10.1017/S0142716411000300>
- Lambacher, S. G., Martens, W. L., Kakehi, K., Marasinghe, C. A., & Molholt, G. (2005). The effects of identification training on the identification and production of American English vowels by native speakers of Japanese. *Applied Psycholinguistics*, 26(2), 227–247. <https://doi.org/10.1017/S0142716405050150>
- Lengeris, A., & Hazan, V. (2010). The effect of native vowel processing ability and frequency discrimination acuity on the phonetic training of English vowels for native speakers of Greek. *The Journal of the Acoustical Society of America*, 128(6), 3757–3768. <https://doi.org/10.1121/1.3506351>
- Lengeris, A., & Nicolaidis, K. (2014). Effect of phonetic training on the perception of English consonants by Greek speakers in quiet and noise conditions. In *Proceedings of Meetings on Acoustics* (Vol. 22, No. 1). AIP Publishing. <https://doi.org/10.1121/2.0000025>
- Lerdpaisalwong, S. (2015). *Perception of training of Thai learners: American English consonants and vowels* (Publication No. 3732444) [Doctoral dissertation, The University of Wisconsin-Milwaukee]. ProQuest Dissertations and Theses Global.
- Lively, S. E., Logan, J. S., & Pisoni, D. B. (1993). Training Japanese listeners to identify English /r/ and /l/. II: The role of phonetic environment and talker variability in learning new perceptual categories. *The Journal of the Acoustical Society of America*, 94(3), 1242–1255. <https://doi.org/10.1121/1.408177>
- Lively, S. E., Pisoni, D. B., Yamada, R. A., Tohkura, Y. I., & Yamada, T. (1994). Training Japanese listeners to identify English /r/ and /l/. III. Long-term retention of new phonetic categories. *The Journal of the Acoustical Society of America*, 96(4), 2076–2087. <https://doi.org/10.1121/1.410149>
- Mokari, P. G., & Werner, S. (2018). Perceptual training of second-language vowels: Does musical ability play a role? *Journal of Psycholinguistic Research*, 47(1), 95–112. <https://doi.org/10.1007/s10936-017-9517-8>
- Nishi, K., & Kewley-Port, D. (2007). Training Japanese listeners to perceive American English vowels:

- Influence of training sets. *Journal of Speech, Language, and Hearing Research*, 50(6), 1496–1509. [https://doi.org/10.1044/1092-4388\(2007/103\)](https://doi.org/10.1044/1092-4388(2007/103))
- Poulsen, B., Bohn, O. S., & Rasmussen, S. (2023). Generalization of training to an untrained phonetic environment: Initial /sz/ to final /sz/. In *Proceedings of the International Congress of Phonetic Sciences* (Vol. 20).
- Sadakata, M., & McQueen, J. M. (2014). Individual aptitude in Mandarin lexical tone perception predicts effectiveness of high-variability training. *Frontiers in Psychology*, 5. <https://doi.org/10.3389/fpsyg.2014.01318>
- Shum, K. K., Au, T. K., Romo, L. F., & Jun, S.-A. (2021). Learning challenging L2 sounds via computer training: High-variability perceptual training for children and adults. *Language Learning and Development*, 17(4), 327–342. <https://doi.org/10.1080/15475441.2021.1876699>
- Silpachai, A. (2020). The role of talker variability in the perceptual learning of Mandarin tones by American English listeners. *Journal of Second Language Pronunciation*, 6(2), 209–235. <https://doi.org/10.1075/jslp.19010.sil>
- Wang, X. (2013). Perception of Mandarin tones: The effect of L1 background and training. *The Modern Language Journal*, 97(1), 144–160. <https://doi.org/10.1111/j.1540-4781.2013.01386.x>
- Wang, Y., Spence, M. M., Jongman, A., & Sereno, J. A. (1999). Training American listeners to perceive Mandarin tones. *The Journal of the Acoustical Society of America*, 106(6), 3649–3658. <https://doi.org/10.1121/1.428217>
- Wong, W. S. (2013). *Training the perception and production of English vowels /ɪ/-/i:/, /e/-/æ/ and /o/-/u:/ by Cantonese ESL Learners in Hong Kong* [Doctoral dissertation, Chinese University of Hong Kong].
- Zhang, X., Cheng, B., Qin, D., & Zhang, Y. (2021). Is talker variability a critical component of effective phonetic training for nonnative speech? *Journal of Phonetics*, 87, Article 101071. <https://doi.org/10.1016/j.wocn.2021.101071>
