# Supplementary material
Source: publisher figshare collection journal article supplement (https://asha.figshare.com/articles/dataset/_/28319345)
Supplement: Supplementary file 5 [file 1]

**Supplemental Material S5.** Characteristics of studies included in quantitative synthesis.

| No | First author<br>Year | Source | TL<br>(L1) | Participant  |                |             |                                                                               | Training                         |                                  |                                  | Test         |                |                 |
|----|----------------------|--------|------------|--------------|----------------|-------------|-------------------------------------------------------------------------------|----------------------------------|----------------------------------|----------------------------------|--------------|----------------|-----------------|
|    |                      |        |            | Proficiency  | Sample<br>size | Mean<br>age | Target phones                                                                 | Conditions<br>(talker<br>number) | Talker<br>presentation<br>format | Training<br>exposure<br>(tokens) | Test<br>task | Talker<br>type | Stimuli<br>type |
| 1  | Barriuso 2018a       | D      | English    | Beginner     | 17:7           | 31-45       | /ɪ-ε/, /ε-æ/, /ɑ-ʌ/                                                           | 0:30                             | Intermixed                       | 0:1800                           | D            | U              | B               |
| 2  | Barriuso 2018b       | D      | English    | Intermediate | 10:10          | 22.8        | /ɪ-ε/, /ε-æ/, /ɑ-ʌ/                                                           | 0:30                             | Intermixed                       | 0:3600                           | D            | U              | B               |
| 3  | Bradlow 1999         | J      | English    | Intermediate | 12:11          | 19-22       | /r/-/l/                                                                       | 0:5                              | Blocked                          | 0:3060                           | I            | U              | U               |
| 4  | Brekelmans 2022      | J      | English    | Intermediate | 80:86          | 20.4        | /r/-/l/                                                                       | 1:5                              | Blocked                          | 4080:4080                        | I            | U              | U               |
| 5  | Deng 2018            | J      | Mandarin   | Beginner     | 16:16          | 25.63       | T1, T2, T4                                                                    | 1:4                              | Intermixed                       | 864:864                          | I            | U              | U               |
| 6  | Dong 2019            | J      | Mandarin   | Beginner     | 20:20:20       | 24.62       | T1, T2, T3, T4                                                                | 1:4:4                            | Blocked                          | 1728:1728:1728                   | D            | U              | B               |
| 7  | Fouz-González 2021   | J      | English    | Intermediate | 22:25          | 21.4        | /i: ɪ æ ʌ ɜ: e ɒ ɔ:/                                                          | 0:4                              | Intermixed                       | 0:1536                           | I            | U              | B               |
| 8  | Giannakopoulou 2017a | J      | English    | Advanced     | 10:11          | 24.3        | /i:/-/l/                                                                      | 1:4                              | Intermixed                       | 3200:3200                        | D            | B              | B               |
| 9  | Giannakopoulou 2017b | J      | English    | Advanced     | 9:11           | 24.3        | /i:/-/l/                                                                      | 1:4                              | Intermixed                       | 3200:3200                        | D            | B              | B               |
| 10 | Lambacher 2005       | J      | English    | Intermediate | 20:34          | 20.4        | /æ/, /ɑ/, /ʌ/, /ɔ/, /ɜ:/                                                      | 0:5                              | Intermixed                       | 0:450                            | I            | T              | B               |
| 11 | Lengeris 2010        | J      | English    | Advanced     | 10:18          | 24.07       | /i:/, /ɪ/, /aɪ/, /eɪ/, /u:/, /aʊ/, /ɒ/, /ɜ:/, /əʊ/, /ɔ:/, /e/, /ɑ:/, /æ/, /ʌ/ | 0:5                              | Blocked                          | 0:1125                           | I            | B              | B               |
| 12 | Lengeris 2014        | C      | English    | Intermediate | 9:13           | 20          | /p/, /b/, /t/, /d/, /k/, /s/, /ʃ/                                             | 0:5                              | Blocked                          | 0:980                            | I            | N/A            | B               |
| 13 | Lerdpaisalwong 2015a | D      | English    | Intermediate | 9:10           | 18-24       | /i, ɪ, u, ʊ, ε, ɑ, ʌ, æ, ɔ/                                                   | 2:2                              | Blocked                          | 1512:504                         | I            | B              | B               |
| 14 | Lerdpaisalwong       | D      | English    | Intermediate | 10:10          | 18-         | /ð, d, θ, t, v, w, r, l, z, s, tʃ, ʃ, b,                                      | 2:2                              | Blocked                          | 1792:448                         | I            | B              | B               |

|    |                |   |          |              |        |       |                                                                               |       |            |             |   |   |     |
|----|----------------|---|----------|--------------|--------|-------|-------------------------------------------------------------------------------|-------|------------|-------------|---|---|-----|
|    | 2015b          |   |          |              |        | 24    | p, g, k/                                                                      |       |            |             |   |   |     |
| 15 | Lerdpaisalwong | D | English  | Intermediate | 9:10   | 18-24 | /ð, d, θ, t, v, f, r, l, z, s, tʃ, ʃ, b, p, g, k/                             | 2:2   | Blocked    | 1792:672    | I | B | B   |
| 16 | Lively 1993    | J | English  | Intermediate | 6:6    | N/A   | /r/-/l/                                                                       | 1:5   | Blocked    | 4080:3780   | I | U | U   |
| 17 | Lively 1994    | J | English  | Intermediate | 23:19  | 18-34 | /r/-/l/                                                                       | 0:5   | Blocked    | 0:4080      | I | U | U   |
| 18 | Mokari 2018    | J | English  | Intermediate | 10:28  | 25.43 | /i:/, /ɪ/, /aɪ/, /eɪ/, /u:/, /aʊ/, /ɒ/, /ɜ:/, /əʊ/, /ɔ:/, /e/, /ɑ:/, /æ/, /ʌ/ | 0:5   | Blocked    | 0:1125      | D | U | N/A |
| 19 | Nishi 2007     | J | English  | N/A          | 5:6    | 27    | /i:, ɪ, ɛ, æ, ɑ:, ɔ:, ʊ, ʌ, u:/                                               | 0:2   | Blocked    | 0:972       | I | B | B   |
| 20 | Poulsen 2023   | C | English  | Advanced     | 9:16   | 23.4  | /s, z/                                                                        | 0:2   | Intermixed | 0:1200      | I | T | B   |
| 21 | Sadakata 2014  | J | Mandarin | Beginner     | 15:15  | 21    | T21, T31                                                                      | 3:5   | Blocked    | 800:800     | I | T | B   |
| 22 | Shum 2021      | J | English  | Intermediate | 18:18  | 18-22 | /p, t, k, b, d, g/                                                            | 0:4   | Intermixed | 0:1440      | I | U | B   |
| 23 | Silpachai 2020 | J | Mandarin | Beginner     | 13:14  | 21.7  | T1, T2, T3, T4                                                                | 1:4   | Blocked    | 2880:2880   | I | U | U   |
| 24 | Wang 1999      | J | Mandarin | Beginner     | 8:8    | N/A   | T1, T2, T3, T4                                                                | 0:4   | Blocked    | 0:720       | I | U | U   |
| 25 | Wang 2013      | J | Mandarin | Beginner     | 10:10  | 22.4  | T1, T2, T3, T4                                                                | 0:4   | Blocked    | 0:640       | I | T | N/A |
| 26 | Wong 2013a     | D | English  | Intermediate | 10:7:9 | 16.3  | /i/-/I/                                                                       | 0:1:6 | Intermixed | 0:2400:2400 | I | T | T   |
| 27 | Wong 2013b     | D | English  | Intermediate | 10:7:9 | 16.3  | /e/-/æ/                                                                       | 0:1:6 | Intermixed | 0:2400:2400 | I | T | T   |
| 28 | Wong 2013c     | D | English  | Intermediate | 10:7:9 | 16.3  | /ʊ/-/u:/                                                                      | 0:1:6 | Intermixed | 0:2400:2400 | I | T | T   |
| 29 | Wong 2013d     | D | English  | Intermediate | 8:8    | 16.3  | /i/-/I/                                                                       | 1:6   | Intermixed | 2400:2400   | I | T | T   |
| 30 | Wong 2013e     | D | English  | Intermediate | 8:8    | 16.3  | /e/-/æ/                                                                       | 1:6   | Intermixed | 2400:2400   | I | T | T   |
| 31 | Wong 2013f     | D | English  | Intermediate | 8:8    | 16.3  | /ʊ/-/u:/                                                                      | 1:6   | Intermixed | 2400:2400   | I | T | T   |
| 32 | Zhang 2021     | J | English  | Intermediate | 20:20  | 21    | /i/-/I/                                                                       | 1:4   | Intermixed | 840:840     | I | B | B   |

*Note.* (1) Abbreviations: J = journal; D = dissertation; C = conference; T1 = Mandarin tone 1; T2 = Mandarin tone 2; T3 = Mandarin tone 3; T4 = Mandarin tone 4; I = identification; D = discrimination; T = trained; U = untrained; B = both; N/A = not available. (2) Information involves only the task included in the quantitative synthesis.
