# Supplementary material
Source: publisher figshare collection journal article supplement (https://asha.figshare.com/articles/dataset/_/28319345)
Supplement: Supplementary file 8 [file 1]

## Supplemental Material S2. Calculation of effect sizes.

We computed  $d$  using

$$d = \frac{\bar{Y}_1 - \bar{Y}_2}{S_{Within}},$$

where  $\bar{Y}_1$  and  $\bar{Y}_2$  are the sample means of the pre-post scores, and  $S_{Within}$  is estimated using

$$S_{Within} = \sqrt{\frac{S_{pre}^2 + S_{post}^2}{2}}.$$

The variance of  $d$  is given by

$$V_d = \left( \frac{1}{n} + \frac{d^2}{2n} \right) 2(1 - r),$$

where  $r$  is the correlation between pretest and posttest,  $n$  is the number of pairs. The standard error of  $d$  is the square root of  $V_d$ .

Hedge's  $g$  is given by

$$g = J(df)d,$$

where the correction factor  $J(df)$  is given by

$$J(df) = 1 - \frac{3}{4df - 1}.$$

The degrees of freedom for computing  $J$  is  $n - 1$ , where  $n$  is the number of pairs.

For articles that only reported  $F$  statistics from one-way repeated measures ANOVA,

$$d = \pm \sqrt{\frac{2F(1 - r)}{n}}$$

$$v = \left( \frac{1}{n} + \frac{d^2}{2n} \right) 2(1 - r)$$

where  $r$  is the correlation between pretest and posttest,  $n$  is the number of pairs, and the sign of  $d$  reflect the direction of the mean difference.

## Reference

Borenstein, M., & Hedges, L. V. (2019). Effect sizes for meta-analysis. In H. Cooper, L. V. Hedges, & J. C. Valentine (Eds.), *Handbook of research synthesis and meta-analysis* (pp. 208–243). Russell Sage Foundation.
