# Supplementary material
Source: publisher figshare collection journal article supplement (https://asha.figshare.com/articles/dataset/_/28319345)
Supplement: Supplementary file 9 [file 1]

## Supplemental Material S9. Meta-regression results.

**Table S1.** The posterior estimates of between-study standard deviation with 95% CrIs and model fit from the random effects models including the covariate of the target phonetic category (consonant, vowel, tone) with different assumptions.

| Model without covariate |                      | Models including covariate |                      |                       |
|-------------------------|----------------------|----------------------------|----------------------|-----------------------|
|                         |                      | Independent                | Exchangeable         | Common                |
| $\sigma$                | 0.60<br>[0.39, 0.90] | 0.65<br>[0.42, 1.01]       | 0.62<br>[0.40, 0.94] | 0.623<br>[0.41, 0.94] |
| $\bar{D}_{res}^a$       | 67.54                | 66.28                      | 67.01                | 67.25                 |
| $p_D$                   | 57.65                | 59.78                      | 58.67                | 58.22                 |
| $DIC$                   | 70.28                | 71.15                      | 70.76                | 70.56                 |

<sup>a</sup> Compare to 66 data points.

**Table S2.** The posterior estimates of the interaction terms with 95% CrIs from the random effects models including the covariate of target phonetic category (consonant, vowel, tone) with different assumptions.

|                           | Independent model<br>$\beta$ [95%CrI] | Exchangeable model<br>$\beta$ [95%CrI] | Common model<br>$\beta$ [95%CrI] |
|---------------------------|---------------------------------------|----------------------------------------|----------------------------------|
| $\beta_1$ -single talker  | 0.57 [-1.00, 2.14]                    | 0.27 [-0.73, 1.47]                     | 0.07 [-0.77, 0.89]               |
| $\beta_1$ -two talkers    | -0.29 [-2.53, 1.93]                   | 0.06 [-1.18, 1.24]                     | 0.07 [-0.77, 0.89]               |
| $\beta_1$ -three talkers  | -0.30 [-194.60, 195.60]               | 0.13 [-1.51, 1.93]                     | 0.07 [-0.77, 0.89]               |
| $\beta_1$ -four talkers   | 1.30 [-0.42, 3.14]                    | 0.32 [-0.70, 1.71]                     | 0.07 [-0.77, 0.89]               |
| $\beta_1$ -five talkers   | -0.58 [-1.80, 0.64]                   | -0.13 [-1.18, 0.83]                    | 0.07 [-0.77, 0.89]               |
| $\beta_1$ -six talkers    | -7.87 [-42.10, 36.32]                 | 0.13 [-1.47, 1.96]                     | 0.07 [-0.77, 0.89]               |
| $\beta_1$ -thirty talkers | 25.83 [-52.98, 75.75]                 | 0.13 [-1.49, 1.97]                     | 0.07 [-0.77, 0.89]               |
| $\beta_2$ -single talker  | -0.07 [-2.05, 1.81]                   | 0.06 [-1.15, 1.22]                     | 0.07 [-0.77, 0.89]               |
| $\beta_2$ -two talkers    | 0.02 [-197.90, 195.20]                | 0.13 [-1.50, 1.93]                     | 0.07 [-0.77, 0.89]               |
| $\beta_2$ -three talkers  | -6.17 [-109.00, 75.13]                | 0.13 [-1.49, 1.88]                     | 0.07 [-0.77, 0.89]               |
| $\beta_2$ -four talkers   | 0.84 [-1.04, 2.68]                    | 0.21 [-0.84, 1.49]                     | 0.07 [-0.77, 0.89]               |
| $\beta_2$ -five talkers   | 1.62 [-65.25, 47.96]                  | 0.12 [-1.51, 1.87]                     | 0.07 [-0.77, 0.89]               |
| $\beta_2$ -six talkers    | -0.01 [-196.50, 195.50]               | 0.13 [-1.52, 1.96]                     | 0.07 [-0.77, 0.89]               |
| $\beta_2$ -thirty talkers | -0.21 [-196.10, 196.50]               | 0.13 [-1.53, 1.93]                     | 0.07 [-0.77, 0.89]               |

**Table S3.** The posterior estimates of between-study standard deviation with 95% CrIs and model fit from the random effects models including the covariate of target language proficiency (low, intermediate, advanced) with different assumptions.

| Model without covariate |                      | Models including covariate |                      |                      |
|-------------------------|----------------------|----------------------------|----------------------|----------------------|
|                         |                      | Independent                | Exchangeable         | Common               |
| $\sigma$                | 0.62<br>[0.41, 0.93] | 0.66<br>[0.42, 1.04]       | 0.63<br>[0.40, 0.96] | 0.64<br>[0.42, 0.96] |
| $\bar{D}_{res}^a$       | 65.42                | 64.17                      | 64.85                | 65.16                |
| $p_D$                   | 56.25                | 58.11                      | 57.14                | 56.76                |
| $DIC$                   | 67.79                | 68.39                      | 68.10                | 68.03                |

<sup>a</sup> Compare to 64 data points.

**Table S4.** The posterior estimates of the interaction terms with 95% CrIs from the random effects models including the covariate of L2 proficiency (beginner, intermediate, advanced) with different assumptions.

|                           | Independent model<br>$\beta$ [95%CrI] | Exchangeable model<br>$\beta$ [95%CrI] | Common model<br>$\beta$ [95%CrI] |
|---------------------------|---------------------------------------|----------------------------------------|----------------------------------|
| $\beta_1$ -single talker  | -0.49 [-2.30, 1.27]                   | 0.09 [-1.39, 1.42]                     | 0.37 [-0.72, 1.51]               |
| $\beta_1$ -two talkers    | 0.18 [-194.60, 193.60]                | 0.31 [-1.53, 2.00]                     | 0.37 [-0.72, 1.51]               |
| $\beta_1$ -three talkers  | 0.25 [-195.30, 195.10]                | 0.30 [-1.59, 2.00]                     | 0.37 [-0.72, 1.51]               |
| $\beta_1$ -four talkers   | -0.44 [-2.12, 1.18]                   | 0.14 [-1.25, 1.41]                     | 0.37 [-0.72, 1.51]               |
| $\beta_1$ -five talkers   | 3.36 [-17.96, 23.15]                  | 0.29 [-1.55, 1.69]                     | 0.37 [-0.72, 1.51]               |
| $\beta_1$ -six talkers    | 0.70 [-196.80, 195.30]                | 0.30 [-1.58, 2.01]                     | 0.37 [-0.72, 1.51]               |
| $\beta_1$ -thirty talkers | 1.24 [-0.96, 3.46]                    | 0.45 [-0.85, 1.88]                     | 0.37 [-0.72, 1.51]               |
| $\beta_2$ -single talker  | 0.71 [-0.90, 2.41]                    | 0.51 [-0.74, 1.82]                     | 0.37 [-0.72, 1.51]               |
| $\beta_2$ -two talkers    | -4.26 [-101.00, 91.09]                | 0.30 [-1.55, 2.00]                     | 0.37 [-0.72, 1.51]               |
| $\beta_2$ -three talkers  | -0.62 [-198.40, 194.60]               | 0.30 [-1.54, 2.00]                     | 0.37 [-0.72, 1.51]               |
| $\beta_2$ -four talkers   | 0.34 [-1.19, 1.91]                    | 0.32 [-0.93, 1.51]                     | 0.37 [-0.72, 1.51]               |
| $\beta_2$ -five talkers   | 3.50 [-17.74, 23.51]                  | 0.29 [-1.47, 1.76]                     | 0.37 [-0.72, 1.51]               |
| $\beta_2$ -six talkers    | 7.44 [-132.60, 98.51]                 | 0.30 [-1.61, 1.91]                     | 0.37 [-0.72, 1.51]               |
| $\beta_2$ -thirty talkers | 0.88 [-196.70, 198.40]                | 0.31 [-1.58, 2.00]                     | 0.37 [-0.72, 1.51]               |

**Table S5.** Model fit for the inconsistency model estimated at the range of training exposure values (thousand tokens).

|                   | Value = 0.45         | Value = 1.49<br>(Mean value) | Value = 2.45         | Value = 3.45         | Value = 4.45         |
|-------------------|----------------------|------------------------------|----------------------|----------------------|----------------------|
| $\sigma$          | 0.58<br>[0.36, 0.92] | 0.59<br>[0.36, 0.92]         | 0.59<br>[0.36, 0.92] | 0.59<br>[0.36, 0.92] | 0.59<br>[0.36, 0.92] |
| $\bar{D}_{res}^a$ | 68.35                | 68.15                        | 68.28                | 68.21                | 68.31                |
| $p_D$             | 58.46                | 58.31                        | 58.38                | 58.41                | 58.44                |
| $DIC$             | 71.89                | 71.54                        | 71.74                | 71.71                | 71.84                |
