# Supplementary material
Source: publisher figshare collection journal article supplement (https://asha.figshare.com/articles/dataset/_/28319345)
Supplement: Supplementary file 10 [file 1]

**Supplemental Material S10.** Sensitivity analyses.

**Table S6.** Posterior median SMD and 95% CrI relative to no-training control for three sensitivity analyses.

| Condition             | Only studies with low<br>bias risk | Correlation $r = .5$ | Correlation $r = .9$ |
|-----------------------|------------------------------------|----------------------|----------------------|
|                       | SMD [95% CrI]                      | SMD [95% CrI]        | SMD [95% CrI]        |
| Single talker-blocked | 1.06 [0.74, 1.42]                  | 1.00 [0.76, 1.28]    | 1.02 [0.70, 1.36]    |
| Two talkers-blocked   | 1.65 [0.15, 3.18]                  | 1.27 [0.44, 2.09]    | 1.27 [0.32, 2.22]    |
| Two talkers-mixed     | NA                                 | 1.66 [0.34, 2.93]    | 1.65 [-0.05, 3.34]   |
| Three talkers-blocked | 1.42 [-0.73, 3.60]                 | 1.52 [-0.14, 3.20]   | 1.38 [-1.16, 3.92]   |
| Four talkers-blocked  | 1.93 [1.15, 2.75]                  | 1.36 [0.85, 1.95]    | 1.60 [0.95, 2.27]    |
| Four talkers-mixed    | 1.08 [0.66, 1.54]                  | 1.01 [0.70, 1.36]    | 1.08 [0.62, 1.54]    |
| Five talkers-blocked  | 0.94 [0.66, 1.26]                  | 1.05 [0.81, 1.29]    | 0.90 [0.59, 1.22]    |
| Five talkers-mixed    | 1.02 [-2.55, 4.67]                 | 1.02 [-1.43, 3.48]   | 1.04 [-3.39, 5.46]   |
| Six talkers-mixed     | 1.41 [0.98, 1.85]                  | 1.39 [0.97, 1.82]    | 1.37 [0.94, 1.80]    |
| Thirty talkers-mixed  | 1.42 [-0.73, 3.60]                 | 0.23 [-0.18, 0.64]   | 0.26 [-0.24, 0.78]   |
